# Supplementary material for: The Effects of Statins on Neurotransmission and Their Neuroprotective Role in Neurological and Psychiatric Disorders
Source: MDPI journal article supplement (doi:10.3390/molecules26102838), 2021-05-11
Supplement: s1 [file s1]

## Supplementary Information

# The Effects of Statins on Neurotransmission and Their Neuroprotective Role in Neurological and Psychiatric Disorders

Michał Kosowski <sup>1,\*</sup>, Joanna Smolarczyk-Kosowska <sup>2</sup>, Marcin Hachuła <sup>1</sup>, Mateusz Maligłowska <sup>1</sup>, Marcin Basiak <sup>1</sup>, Grzegorz Machnik <sup>1</sup>, Robert Pudło <sup>2</sup> and Bogusław Okopień <sup>1</sup>

<sup>1</sup> Department of Internal Medicine and Clinical Pharmacology, Medical University of Silesia, Medyków 18, 40-752 Katowice, Poland

<sup>2</sup> Department of Psychiatry, Faculty of Medical Sciences in Zabrze, Medical University of Silesia, Katowice, Poland

**Table S1.** Preclinical effects of statins on neurotransmission and neuroprotection.

| Statin       | Effect                                                                                                                                  | References                    |
|--------------|-----------------------------------------------------------------------------------------------------------------------------------------|-------------------------------|
| All statins  | inhibition of nuclear factor kappa-light-chain-enhancer of activated B cells (NF-κB)                                                    | Sierra et al. [61]            |
|              | decreasing the structural damage of the cytoskeleton                                                                                    | Wang et al. [125]             |
|              |                                                                                                                                         | Deveau et al. [140],          |
|              | increasing serotonin reuptake by serotonin reuptake transporter (SERT)                                                                  | Johnson-Anuna et al. [141]    |
|              | anti-oxidant activity                                                                                                                   | Shishehbor et al. [145]       |
|              | inhibition of lymphocytes by blocking the function of antigen-1 leukocytes (LFA-1)                                                      | Weitz-Schmidt et al. [147]    |
| Atorvastatin | blocking T-cells activation                                                                                                             | Bu et al. [148]               |
|              | decreasing GluN2B glutamate receptor upregulation                                                                                       | Gutierrez-Vargas et al. [106] |
|              | improvement the adhesion protein complex N-methyl-D-aspartate receptor (NMDAR) associated with postsynaptic density protein 95 (PSD-95) | Gutierrez-Vargas et al. [106] |
|              | influence of Akt kinase activation in promoting cell survival and in turn promote synaptic plasticity                                   | Gutierrez-Vargas et al. [106] |
|              | recovering of the actin cytoskeleton and stabilizes microtubules                                                                        | Gutierrez-Vargas et al. [126] |
|              | decreasing level of brain-derived neurotrophic factor (BDNF)                                                                            | Gutierrez-Vargas et al. [106] |

---

  

---

|                                            |                                                                                         |                                  |
|--------------------------------------------|-----------------------------------------------------------------------------------------|----------------------------------|
| Simvastatin                                | inhibition of NMDAR1                                                                    | Yan et al.<br>[63]               |
|                                            | reduction of beta-amyloid (A $\beta$ ) concentration in nerve cells                     | Fassbender et al.<br>[64]        |
|                                            | increasing the amount of acetylcholine (Ach) in brain tissue of rats                    | El-Dessouki et al.<br>[100]      |
|                                            | decreasing oxidative stress                                                             | Campos-Martorell et al.<br>[128] |
|                                            | inhibition of the production of pro-inflammatory cytokines by monocytes                 | Ferro et al.<br>[146]            |
| Lovastatin                                 | activation of a disintegrin and metalloproteinase domain-containing protein 10 (ADAM10) | Kojro et al.<br>[65]             |
|                                            | increasing in the activity of the phospholipid transporter (PLTP)                       | Kojro et al.<br>[65]             |
|                                            | reducing the concentration of plasmaphosphorylated tau181 (p-tau181)                    | Kojro et al.<br>[65]             |
| Pravastatin, simvastatin, and atorvastatin | lowering C-reactive protein (CRP) level                                                 | Jialal et al.<br>[144]           |

---
